# Supplementary material
Source: PubMed Central journal article supplement (PMC7703591)
Supplement: pnas.2004075117.sapp.pdf [file pnas.2004075117.sapp.pdf]

# PNAS

www.pnas.org

Supplementary Information for

## **Rerouting of ribosomal proteins into splicing in plant organelles**

Chuande Wang<sup>1</sup>, Rachel Fourdin<sup>1</sup>, Martine Quadrado<sup>1</sup>, Céline Dargel-Graffin<sup>1</sup>, Dimitri Tolleter<sup>2</sup>, David Macherel<sup>2</sup> and Hakim Mireau<sup>1\*</sup>

<sup>1</sup> Institut Jean-Pierre Bourgin, INRAE, AgroParisTech, Université Paris-Saclay, 78000, Versailles, France

<sup>2</sup> Université d'Angers, Unité Mixte de Recherche 1345, Institut de Recherche en Horticulture et Semences, Angers 49045, France

\*To whom correspondence should be addressed. Email: [hakim.mireau@inra.fr](mailto:hakim.mireau@inra.fr)

### **This PDF file includes:**

SI Material and Methods  
Figs. S1 to S8  
Tables S1 to S3  
References for SI reference citations

## Supplementary Information

### SI Materials and Methods

#### Plant material

*Arabidopsis* (*Arabidopsis thaliana*) Col-0 plants were obtained from the Arabidopsis stock centre of the Institut National de Recherche pour l'Agriculture, l'Alimentation et l'Environnement in Versailles (<http://dbsgap.versailles.inra.fr/portail/>). The Arabidopsis *ul18-l1* (N581267) and *ul18-l8* (N568525 and CS841212) mutants were obtained from the SALK mutant collection (1). Plants were grown in a greenhouse in long day conditions for 10 to 12 weeks before use. Flowers or leaves were harvested simultaneously for all genotypes, snap-frozen in liquid nitrogen and stored at -80°C until use.

For the complementation assays, the coding sequence of *uL18-L1* or *uL18-L8* without stop codon but with 1 kb of promoter region was amplified by PCR and cloned to pGWB13 (2) by Gateway™ cloning, creating C-terminal translational fusions with the 3HA tag. The resulting plasmids were used to transform *ul18-l1* or *ul18-l8-1* heterozygous plants by floral dipping and complemented homozygous mutant plants were identified in the progenies of transgenic plants.

#### Preparation of organelles and stromal protein

*Arabidopsis* mitochondria and chloroplasts were purified from flower buds and young leaves, respectively, as described in (3). Stromal protein fractions were prepared from purified plastids as previously described in (4).

#### Immunodetection of proteins

Proteins were extracted from flowers, leaves or purified organelles in 30 mM HEPES-KOH (pH 7.7), 10 mM Mg(OAc)<sub>2</sub>, 150 mM KOAc, 10% glycerol and 0.5% (w/v) CHAPS. Protein concentrations were measured using Bradford reagents (Bio-Rad) and separated by SDS-PAGE. After electrophoresis, gels were transferred onto PVDF membranes (Bio-Rad) under semidry conditions. Membranes were hybridized with antibodies using dilutions indicated in Table S2.

#### Subcellular distributions of uL18-L1 and uL18-L8 proteins

DNA regions corresponding to the coding sequence of each uL18-Like protein but lacking the stop codon were PCR amplified and transferred into pGWB5 (2) by Gateway™ cloning (Invitrogen) to create GFP translational fusions. The constructs were used to transform *Arabidopsis* plants by floral dipping and GFP fluorescence was visualized in leaf or root cells by confocal microscopy. When necessary, roots of transgenic plants were soaked in a solution of 0.1 μM MitoTracker™ Red to label mitochondria prior to observation.

### **RNA analysis**

RNA extraction, northern blot and quantitative RT-PCR analyses were done as previously described in (5) with primer sets detailed in (6, 7).

### **RNA immunoprecipitation assays**

Immunoprecipitation of uL18-L1-3HA and uL18-L8-3HA were performed using the  $\mu$ MACS HA-Tagged Protein Isolation Kit (Miltenyi Biotec). Briefly, total proteins were extracted from 1 g of Arabidopsis transgenic cells expressing either uL18L1-3HA or uL18L8-3HA in 1 mL of cold lysis buffer (20 mM HEPES-KOH, pH 7.6, 100 mM KCl, 20 mM MgCl<sub>2</sub>, 1 mM DTT, 1% Triton X-100, 1X of complete EDTA-free protease inhibitor (Roche)) for 30 mins on ice. The lysates were clarified by centrifugation at 100,000 g for 20 mins at 4°C and resulting supernatants were incubated with 50  $\mu$ L of anti-HA magnetic beads or protein A magnetic beads (Thermo Fisher Scientific) for 1 h at 4°C with rotation (10 rpm). After three washes with 1 mL of washing buffer (lysis buffer with only 0.1% Triton X-100), proteins were eluted in 120  $\mu$ L of elution buffer provided by the kit and then subjected to immunoblot analysis. Co-immunoprecipitated RNAs were extracted with TRI Reagent® (Invitrogen) and treated with the RTS DNase I (Mobio) prior to RT-qPCR analysis. RNAs representing 1% of the input fraction and the totality of immunoprecipitated RNAs were used for cDNA synthesis. Three microliters of 10-fold diluted cDNA solutions were used in each qPCR reaction.

### **Blue Native gel and in-gel activity assays**

One hundred micrograms of mitochondrial proteins were separated on 4-16% (w/v) polyacrylamide Native PAGE gels (Invitrogen) and then either transferred to PVDF membranes or subjected to in-gel activity staining as in previously described in (5). After electrophoresis, the separated protein complexes were transferred to PVDF membranes for immunoblotting or stained in Coomassie blue R-250. Antibodies listed in Table S2 were used for immuno-detection.

### **Sucrose density gradient centrifugation**

One gram of transformed Arabidopsis cells and the equivalent of 3 to 6 mg of stromal or total mitochondrial proteins were resuspended in 1 mL (for cells) or 200  $\mu$ L (for organelles) of lysis buffer (30 mM HEPES-KOH (pH 7.8), 100 mM KOAc, 10 mM Mg(OAc)<sub>2</sub>, 5 mM  $\beta$ -mercaptoethanol, 5% glycerol, 1% n-dodecyl  $\beta$ -D-maltoside [DDM] and 1X cOmplete™ EDTA-free protease inhibitor (Roche)) and incubated at 4°C for 30 mins. The lysates were then diluted with the same volume of lysis buffer with no DDM and then cleared by ultracentrifugation at 100,000 g for 20 mins. Volumes corresponding to 2 mg of proteins were layered on continuous sucrose gradients (10%-30%) made in lysis buffer without DDM. Sucrose gradients were ultracentrifuged at 268,000 g for 4 hours at

4°C. Gradients were fractionated into 16 fractions of 330 µL and subsequently analysed by immunoblotting.

### **Transformation of Arabidopsis cell suspension cultures**

The coding sequences of *uL18-L1* and *uL18-L8* without their stop codon were PCR amplified and transferred by Gateway™ cloning (Invitrogen) into pGWB14 (2) resulting in C-terminal fusions with the 3xHA coding sequence, expressed under the control of the 35S promoter. These constructs were used to transform an Arabidopsis cell culture as indicated in (8).

### **Analysis of photosynthesis and pigment composition**

Plants were grown in long-day conditions (16:8 hours, 19:21°C L:D) at 120 µmol photons.m<sup>-2</sup>.s<sup>-1</sup> for 4 weeks. Water content of rosette leaves was estimated by measuring the fresh and dry weight (after 48 h at 90°C) of detached rosettes. Leaf chlorophyll and carotenoid pigments were extracted with dimethylformamide and measured according to (9). Chlorophyll fluorescence of rosettes was measured non-invasively at room temperature with a PSI Open FluorCam FC 800-O (Photon Systems Instruments). For each plant, 13 spots, one per leaf (9 spots of 0.02 mm<sup>2</sup> about 500 pixels and 4 spots of 0.01 mm<sup>2</sup> about 200 pixels) were used to get a spatial average of fluorescence over time. Maximum fluorescence was obtained by saturation pulses at 2,800 µmol photons m<sup>-2</sup>.s<sup>-1</sup> for 600 ms. Chlorophyll fluorescence parameters ( $F_v/F_m$ , 1-qP, qL, NPQ<sub>max</sub>, NPQ<sub>relax</sub>) were calculated from  $F_{m'}$  ( $F_m$  if after 45 mins of dark adaption),  $F_{0'}$  ( $F_0$  if after 45 mins of dark adaption) and  $F$  as maxima, minimal and current fluorescence respectively. Actinic light (420 µmol photons.m<sup>-2</sup>.s<sup>-1</sup>) was turned on for 500 s (with a saturating pulses every 80 s) and then dark relaxation time for 280 s (with saturating pulse at 80 s and then 200 s later). The maximum quantum efficiency of PSII photochemistry,  $F_v/F_m$ , was calculated as  $(F_m - F_0)/F_m$ , the Photochemical quenching, 1-qP as  $1 - (F_{m'} - F)/(F_{m'} - F_{0'})$ , the fraction of open PSII centres, qL as  $(F_{m'} - F)/(F_{m'} - F_{0'})$ , and the Non Photochemical Quenching, NPQ as  $(F_m - F_{m'})/F_{m'}$  with NPQ<sub>max</sub> just before turning the light off and NPQ<sub>relax</sub> at the end of the 280 s of relaxation period of dark.



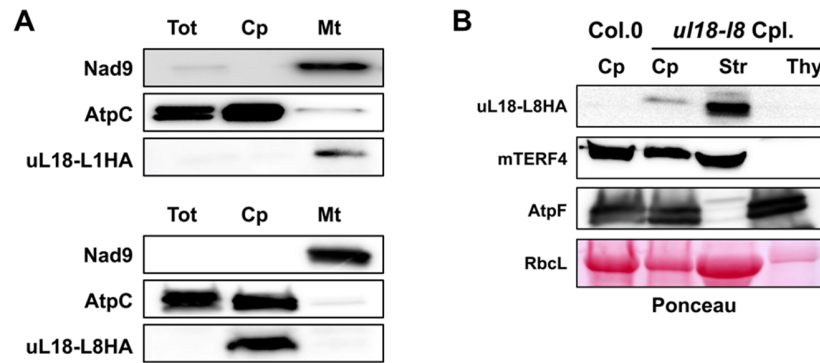

**Fig. S2.** Subcellular distributions of uL18-L1 and uL18-L8 proteins. (A) Total (Tot), chloroplast (Cp) and mitochondrial (Mt) protein extracts were prepared from genetically complemented *uL18-1* and *uL18-18-1* lines and analyzed by immunoblot assays with the indicated antibodies. The detection of the plastid ATP synthase subunit C (AtpC) and the mitochondrial NADH dehydrogenase subunit 9 (Nad9) were used to control the purity of plastid and mitochondrial extracts, respectively. The anti-HA monoclonal antibody was used to detect the uL18-L1-HA and uL18-L8-HA fusion proteins. (B) Detection of the uL18-L8 protein in chloroplast (Cp), stromal (Str) and thylakoid (Thy) fractions by immunoblot analysis. Antibodies to mTERF4 and AtpF were used as control for stromal and thylakoid fractions, respectively. A cropped image of one of the blot stained with Ponceau S illustrates the abundance of the stromal protein RbcL in the different fractions.

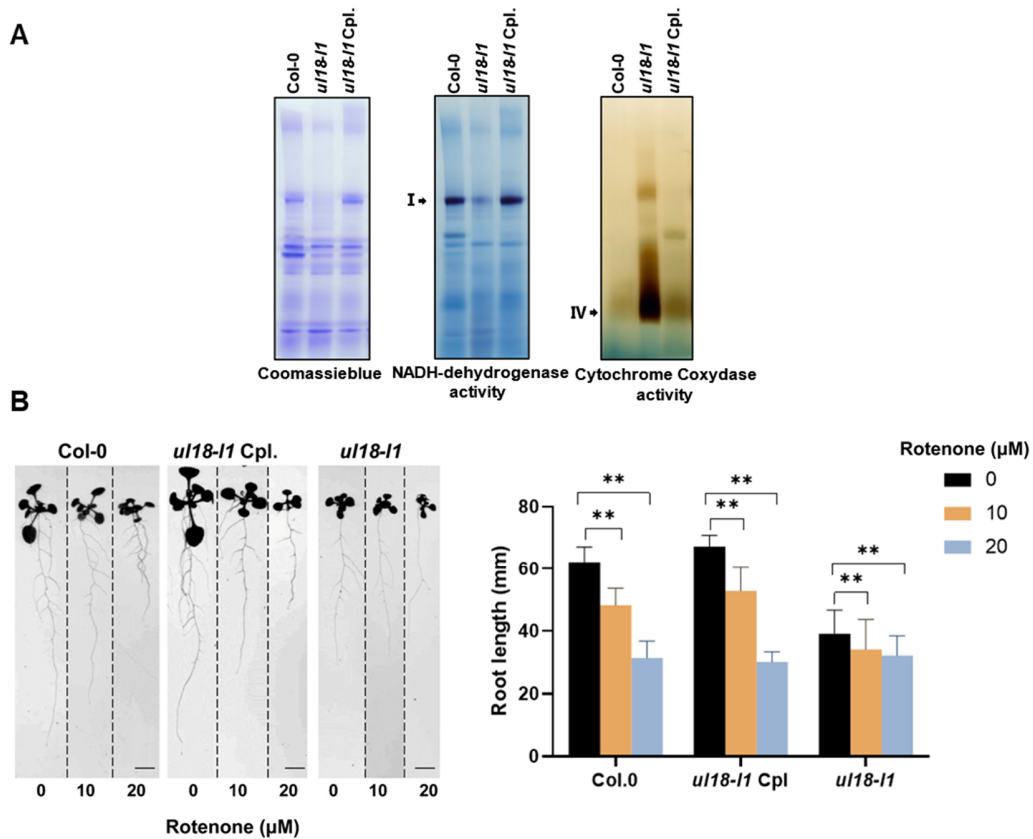

**Fig. S3. *ul18-1* plants are complex I mutants.** (A) Mitochondrial protein extracts prepared from wild-type (Col-0), mutant (*ul18-1*) and complemented (Cpl) plants, separated in BN-PAGE gels and then stained with Coomassie blue or by in gel activity staining to estimate complex I (NADH dehydrogenase) and complex IV (cytochrome c oxidase) accumulation levels. (B) Primary root length of wild-type (Col-0), mutant (*ul18-1*) and complemented plants (Cpl) measured in the absence or in the presence of 10 mM or 20 mM of the complex I inhibitor rotenone. Plants were grown on vertical squared plates for 14 (Col-0 and Cpl) or 24 (*ul18-1*) days prior to measurements (left panel). The values (right panel) are means of three independent biological replicates (error bars indicate SD). Asterisks indicate statistically significant differences between the inhibitor-treated versus the no-inhibitor conditions, for each genotype (Student's t test for paired samples, P, 0.01).

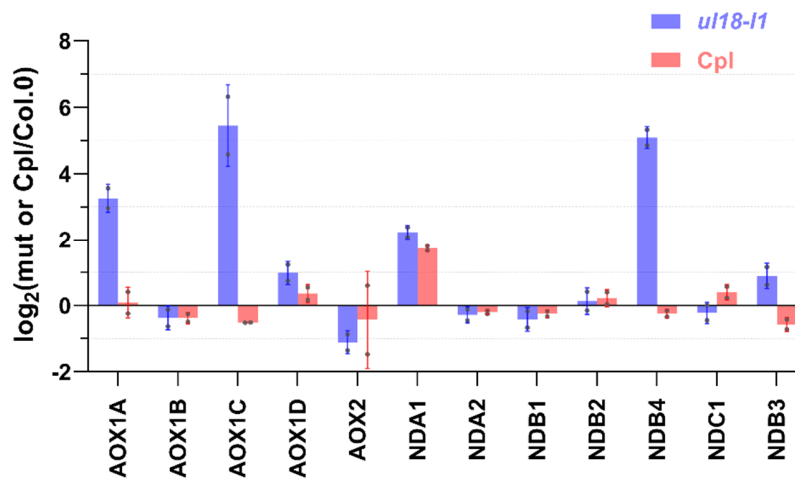

**Fig. S4. The alternative respiratory pathway is induced in *ul18-11* mutant plants.** Quantitative RT-PCR results measuring the relative accumulation levels of alternative oxidase (AOX) and NADH dehydrogenase (*NDA*, *NDB* and *NDC*) transcripts in *ul18-11* mutant and complemented (Cpl) plants. Log<sub>2</sub> ratios of mutant (blue bars) or Cpl (red bars) to wild-type are shown. Two biological repeats and three technical repeats were performed for each genotype in this analysis.



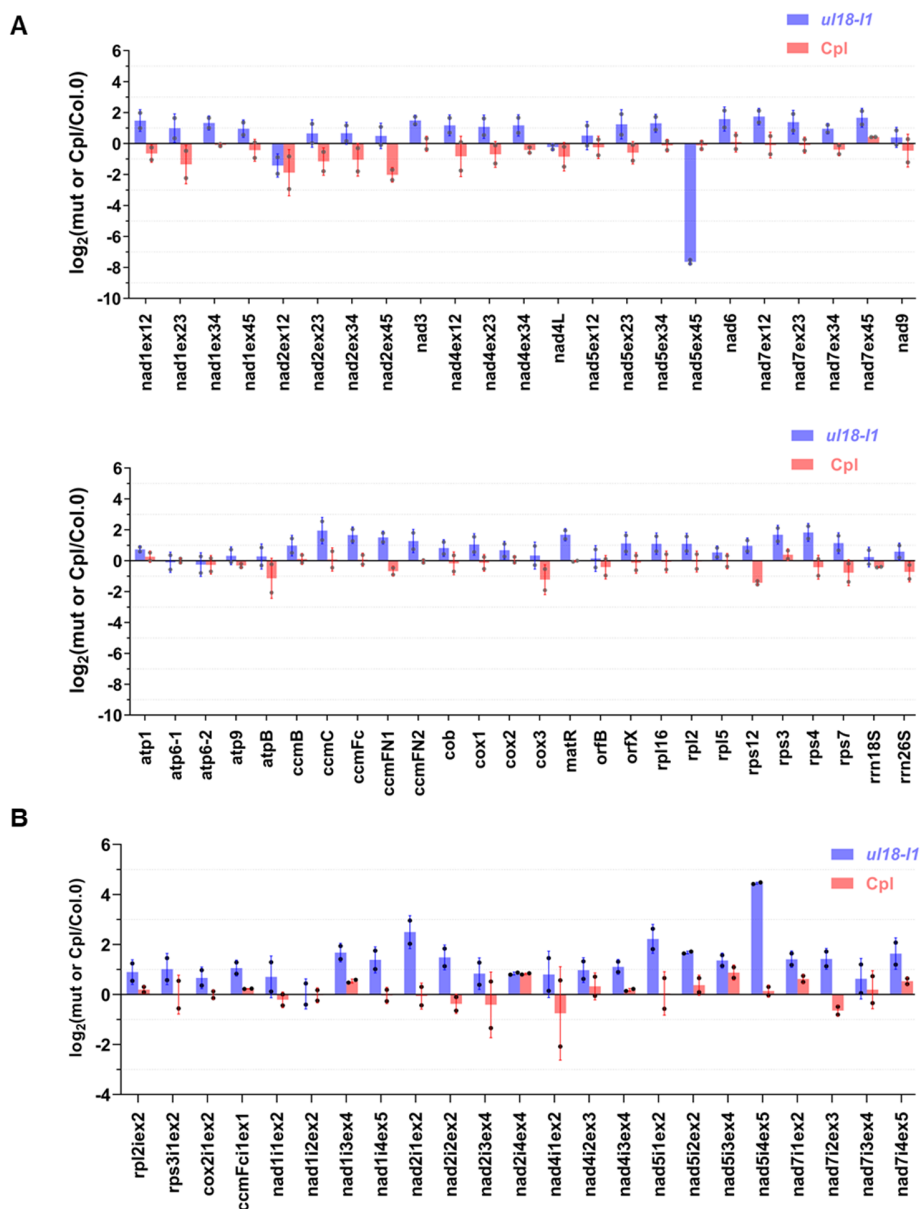

**Fig. S5. Quantitative RT-PCR analysis measuring the accumulation levels of precursor and mature mitochondria-encoded mRNAs in *ul18-1* and complemented (*Cpl*) plants. (A) For mature mRNA quantification, a single PCR was performed for transcripts containing a sole exon. For intron-containing mRNAs, PCR were done using primer pairs across each intron. (B) Precursor mRNAs were specifically quantified using primers situated across the indicated intron (i) - exon (ex) junctions. The bars show log<sub>2</sub> ratios of mRNA abundance in *ul18-1* (blue bars) and complemented (red bars) plants to the wild type (*Col-0*). Three technical replicates and two independent biological repeats were used for each genotype. Standard errors are indicated.**

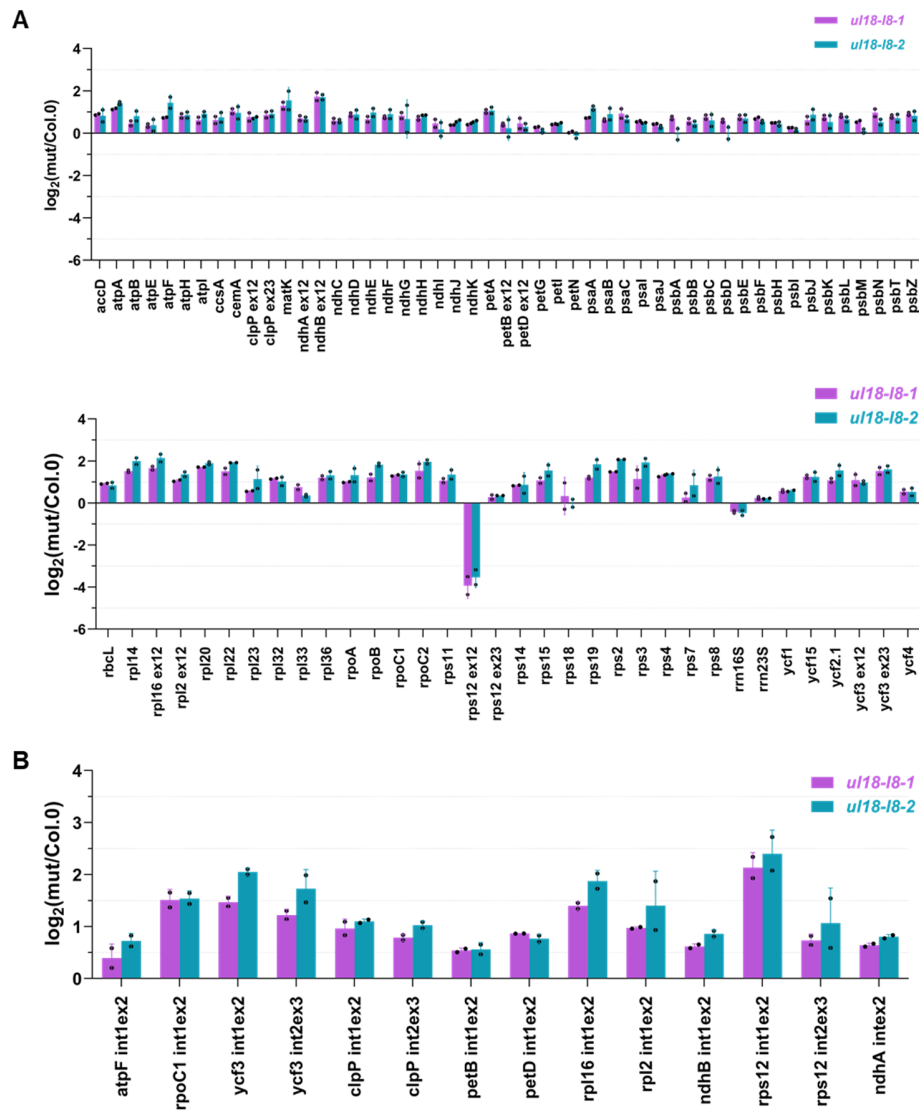

**Fig. S6. Quantitative RT-PCR analysis measuring the accumulation levels of precursor and mature plastid-encoded mRNAs in *ul18-18* mutants.** (A) For mature mRNA quantification, a single PCR was performed for transcripts containing a sole exon. For intron-containing mRNAs, PCR were done using primer pairs across each intron. (B) Precursor mRNAs were specifically quantified using primers situated across the indicated intron (i) - exon (ex) junctions. The graphs depict the log<sub>2</sub> ratios of transcript levels in the mutants as compared with those in wild-type. Three technical replicates and two independent biological repeats were used for each genotype. Standard errors are indicated.

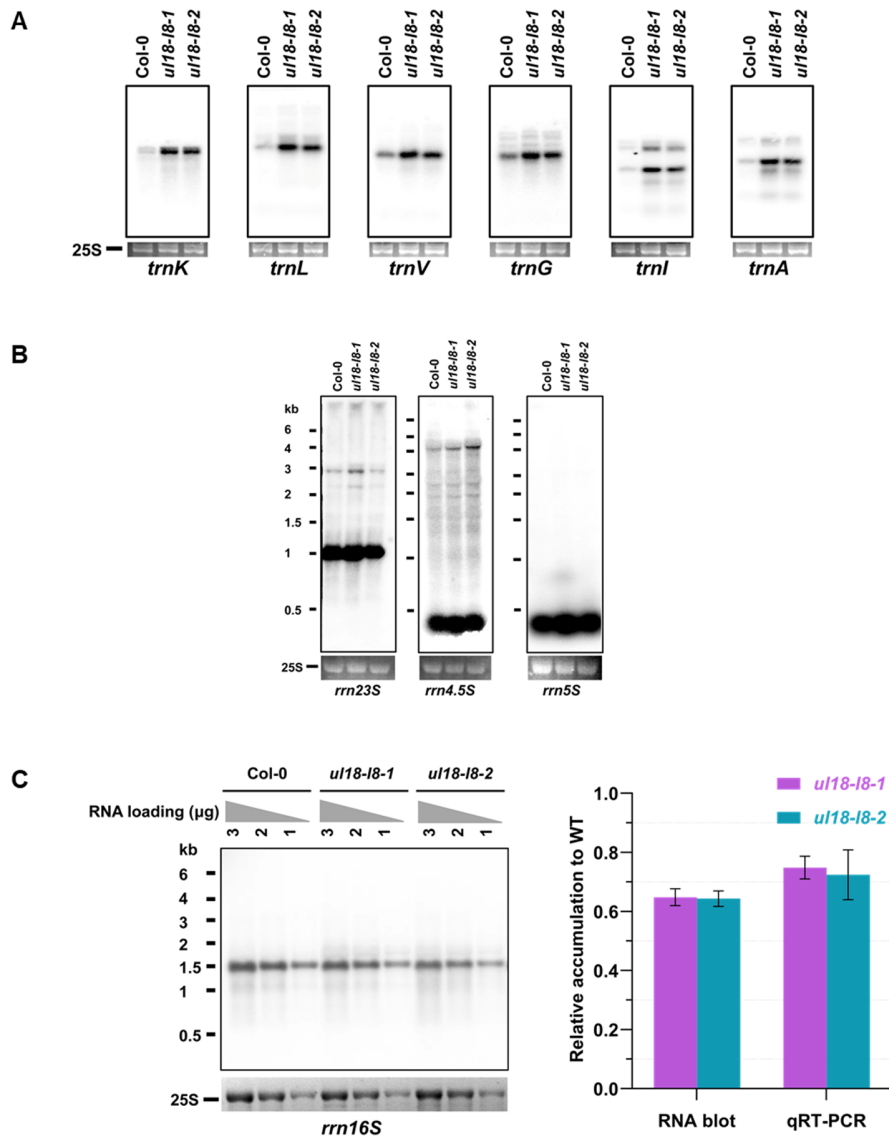

**Fig. S7. Plastid tRNAs and rRNA accumulation in *ul18-18* mutants.** The blots were performed on total RNA of the indicated genotypes and used probes are mentioned below each blot. (A) RNA gel blot hybridizations showing the steady state levels of plastid tRNAs. (B) RNA gel blot analyses measuring the steady state levels of the plastid-encoded 23S, 4.5S and 5S rRNAs. Ethidium bromide staining of 25S RNA is shown below the blots and serves as a loading control. (C) RNA gel blot analyses performed on 1, 2 and 3 μg of total RNA and measuring the steady state levels of the plastid-encoded 16S rRNA. The graphs (right) depict average ratios of 16S transcript levels in the two mutants compared with those in wild-type, as measured by RNA blot assay and qRT-PCR.

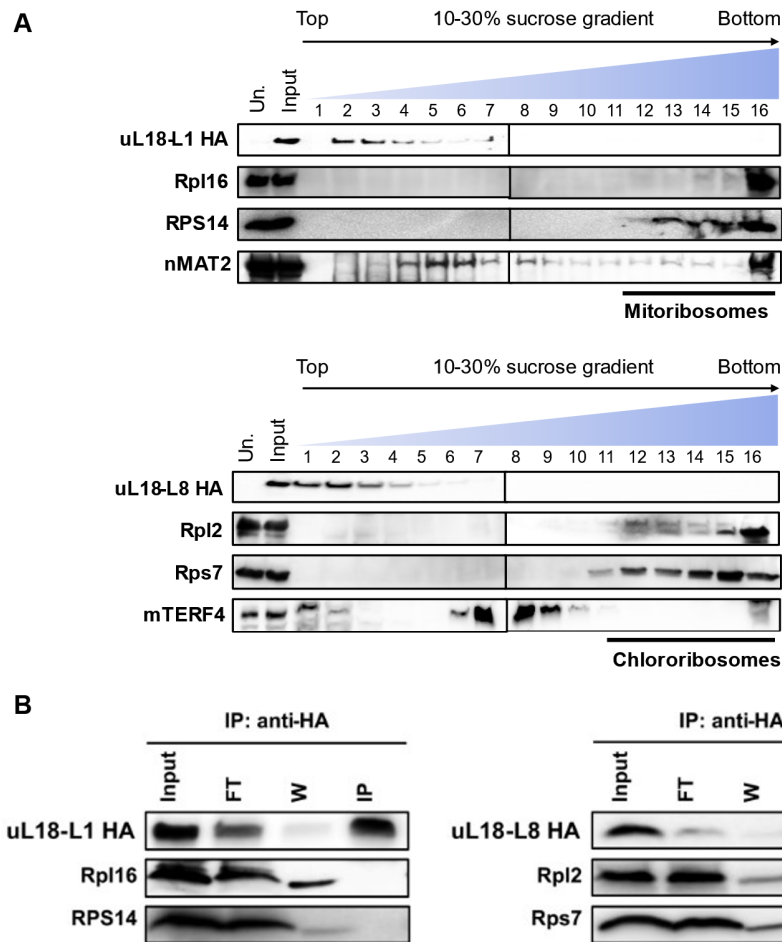

**Fig. S8. uL18-L1 and uL18-L8 do not sediment with ribosomes.** (A) Arabidopsis extracts prepared from cell lines over-expressing the indicated *uL18-Like* genes were loaded on sucrose gradients. Immunoblots of recovered fractions were probed with antibodies as listed in Figure 7, in addition to nMAT2 which is a nuclear-encoded maturase required for splicing multiple group II mitochondrial introns (10). (B) Immunoprecipitation of uL18-L1-3HA and uL18-L8-3HA. Total extracts from transgenic Arabidopsis cell lines expressing uL18-L1-3HA or uL18-L8-3HA were used for immunoprecipitation with anti-HA antibody. Equal volumes of input, flow-through (FT), wash (W) and immunoprecipitated (IP) fractions were analyzed by immunoblot analysis using the indicated antibodies.

**Table S1. A List of Primers Used in This Study.**

| Primer          | Sequence 5'-3'                               | Experiment                         |
|-----------------|----------------------------------------------|------------------------------------|
| L18L5-7         | GCAACGTTTCTTCTCGAACC                         | Genotyping                         |
| L18L5-6         | GTGTCTCCGTTTGCCAGATT                         |                                    |
| L18-8-1bis      | CCGCTGAGGGTAATGTTCTGA                        |                                    |
| L18-8-2bis      | AGAGTTTGTGGAATGCCCGT                         |                                    |
| GWL18L5-8       | CAAAAAAGCAGGCTAAAAATTAGAAGACAGTGTGACAAC      | Complementation;<br>GFP expression |
| GWL18L5-7bis    | CAAGAAAGCTGGGTCGGCCATCATTAGATGACTAGTCT<br>TC |                                    |
| GWL18L5-1       | CAAAAAAGCAGGCTCTATGGCTTTGATGGTTTTGAG         |                                    |
| GWL18-8B        | CAAGAAAGCTGGGTCAGTTTTCGGACTCTCCACTCG         |                                    |
| GWL18-8R        | CAAGAAAGCTGGGTCGGTAAGAACCCGTGTTGCG           |                                    |
| GWL18-8-F       | CAAAAAAGCAGGCTAAAATGGCTGCTTTGACTTCTCT        |                                    |
| nad2e1          | GCAGAATTCGTTCCGGATC                          | mRNA probes for<br>RNA gel blot    |
| nad2e8          | TATGAACTGAGTGCCATTTGA                        |                                    |
| nad5 E7         | AGAAGGAAGCGCTATAATGAC                        |                                    |
| nad5 E6         | TACTCACTATCAAAATGAAAG                        |                                    |
| nad5 intron3b-1 | GAGTCGATACCTTGCTCGCC                         |                                    |
| nad5 intron3b-2 | CGCCTATTACACGGCTCACT                         |                                    |
| nad5 intron4-1  | TCCCTATGGACAAGGGGACA                         |                                    |
| nad5 intron4-2  | ACTCTTCATTCTCCCGTGCT                         |                                    |
| nad5 exon4-1    | TTCAGGTGCTTTTGTTGCGT                         |                                    |
| nad5 exon4-2    | GGCCAATCGTCGGAATGTGT                         |                                    |
| RPS12CpE1-1     | AGACAGCCAATCCGAAACGTC                        |                                    |
| RPS12CpE1-2     | CGAGTACATGTTCCCTCGTCG                        |                                    |
| RPS12CpI1-1     | CATTGGTGCAAATCCAATCAACTC                     |                                    |
| RPS12CpI1-2     | CACATTCTTTGGCTCTACCCC                        |                                    |
| RPS12CpI1-3     | TCGAAGAATGAGGGGCAAAGA                        |                                    |
| RPS12CpI1-4     | TCGCGAATCTCCTCCCTTCT                         |                                    |
| RPS12CpE2-1     | CCAGAGTACGATTAACCTCGGG                       |                                    |
| RPS12CpE2-2     | ACTCCGACAGCATCTAGGGT                         |                                    |
| RPL20-1         | TAGCTCGGAGGCGTAGAACA                         |                                    |
| RPL20-2         | TTGTGCAAGTATTTTCCGATTAAGA                    |                                    |
| RPS7-1          | ATGTCACGCCGAGGTAAGT                          |                                    |
| RPS7-2          | GCAAGTGCTTTTCCCTTGCGT                        |                                    |
| trnA-F          | TGGAGATAAGCGGACTCGAACCCG                     | tRNA probes for<br>RNA gel blot    |
| trnA-R          | GGGGATATAGCTCAGTTGGTAGAGCTCCG                |                                    |
| trnV-F          | TAGGGCTATACGGACTCGAAC                        |                                    |
| trnV-R          | AGGGCTATAGCTCAGTTAGGT                        |                                    |
| trnK-F          | TGGGTTGCCCGGGACTCGAA                         |                                    |
| trnK-R          | GGGTTGCTAACTCAACGGTAGA                       |                                    |
| trnG-F          | GCGGGTATAGTTTAGTGGTAAA                       |                                    |
| trnG-R          | GGGTAGCGGAATCGAACCC                          |                                    |
| trnL-F          | GGGGATATGGCGGAATTGGTAG                       |                                    |
| trnL-R          | TGGGGATAGAGGGACTTGAACC                       |                                    |
| trnI-F          | GGGCTATTAGCTCAGTGGTAG                        |                                    |
| trnI-R          | TGGGCCATCCTGGATTTGAAC                        |                                    |

|                 |                             |                              |                      |
|-----------------|-----------------------------|------------------------------|----------------------|
| rrn16cp1        | TGATTGGGCGTAAAGCGTCT        | rRNA probes for RNA gel blot |                      |
| rrn16cp2        | CTTGGTAGTTTCCACCGCCT        |                              |                      |
| rrn23cp1        | AGGCCTCCCAAAGGTAACG         |                              |                      |
| rrn23cp2        | GTC AAGCTCCCTTCTGCCTT       |                              |                      |
| rrn5cp1         | CCATCCCGA ACTTGGTGGTT       |                              |                      |
| rrn5cp2         | GGCGTCGAGCTATTTTTCCG        |                              |                      |
| rrn4.5cp1       | GCGAGACGAGCCGTTTATCA        |                              |                      |
| rrn4.5cp2       | TGCCTCAGCTGCATACATCA        |                              |                      |
| NAD1exon2_R     | GACCAATAGATACTTCATAAGAGACCA | RIP-qPCR for uL18-L1         |                      |
| Qmnad1intron1R  | CGTGCTCGTACGGTTCATAG        |                              |                      |
| QM0285R         | GCGAGCAGAAGCAAGTTAT         |                              |                      |
| mito091R        | CCCATTCCCTAACCAAGTGGAG      |                              |                      |
| mito337F        | CTTATTTCGTGGCAACCTTCC       |                              |                      |
| QM1320F         | TATTTGTTCTTCGCCGCTTT        |                              |                      |
| QMnad5exon2F    | TGGACCAAGCTACTTATGGATG      |                              |                      |
| QMnad5intron1R  | TTCGCAAATAGTCCGACT          |                              |                      |
| QMnad5intron2F  | GTACGATCGTGTCCGGTGA         |                              |                      |
| QMnad5exon2R    | CTGGCTCTCGGGAGTCTCTT        |                              |                      |
| QM0060F         | AACATTGCAAAGGCATAATGA       |                              |                      |
| QMnad5intron4R  | CCTGTAAACCCCATGATGT         |                              |                      |
| QMnad7intron1F  | ACGGTTTTTAGGGGATCTG         |                              |                      |
| nad7exon2R      | AAGGTAAAGCTTGAAGATAAGTTTTGT |                              |                      |
| QMccb452intronF | CCCGGATCGAATCAGAGTT         |                              |                      |
| QM180F          | CACATGGAGGAGTGTGCATC        |                              |                      |
| QM0160R         | TGGGGGATTAATTGATTGGA        |                              |                      |
| mito037R        | AGCAGTACGAGCTGAAAGGC        |                              |                      |
| rps12F          | TCTCACACCGGGTAAATCCT        |                              | RIP-qPCR for uL18-L8 |
| rps12R          | ATCCGAAACGTCACGAAATC        |                              |                      |
| rps12_exon3F    | TTTGGCTTTTTGACCCATA         |                              |                      |
| rps12_exon2R    | CGTAAAGTTGCCAGAGTACGA       |                              |                      |
| rps12 intron1R  | GGAGCCGTATGAGGTGAAAA        |                              |                      |
| rps12-int1a-2   | GAATCGAGTTCGTCCATTCTATTT    |                              |                      |
| rps12 intron2R  | TGTGGAAAGCCGATTCGAT         |                              |                      |
| QC0130F         | GCTCCTTCACGCAGTTCTTC        |                              |                      |
| atpF intronR    | TTCGGGAAGGGATCATAGAA        |                              |                      |
| QCclpP exon2F   | AATAAGTTGATTTCGAGATTTCCGGT  |                              |                      |
| clpP intron1R   | GAACCGTATGCACCAAAGG         |                              |                      |
| QC0670R         | GTGATGGTTTCGCGAAGTTT        |                              |                      |
| clpP intron2R   | TCATTCTGCGAAATAGAAAAACC     |                              |                      |
| ndhAF           | TTGACGCCACAAATCCAT          |                              |                      |
| ndhA intronR    | AGGCCAAGACCTCATGTACG        |                              |                      |

**Table S2. A list of antibodies used in this study.**

| <b>Antibody</b> | <b>Full Name of detected proteins</b>         | <b>Host</b> | <b>Dilution</b> | <b>Source</b>         |
|-----------------|-----------------------------------------------|-------------|-----------------|-----------------------|
| AOX1a           | Alternative oxidase 1A                        | Rabbit      | 1:1,000         | Agrisera (AS04 054)   |
| ATPC            | Gamma subunit of ATP synthase                 | Rabbit      | 1:5,000         | Agrisera (AS08 312)   |
| ATPF            | CF0I subunit of ATP synthase                  | Rabbit      | 1:5,000         | Agrisera (AS10 1604)  |
| ATP $\beta$     | Beta subunit of ATP synthase                  | Chicken     | 1:5,000         | Agrisera (AS05 085)   |
| CAL             | Gamma-type carbonic anhydrase like            | Mouse       | 1:5,000         | (11)                  |
| Cox1            | Cytochrome oxidase subunit I                  | Mouse       | 1:1,000         | Abcam                 |
| Cox2            | Cytochrome oxidase subunit II                 | Rabbit      | 1:1,000         | Agrisera (AS04 053A)  |
| CYT c           | Cytochrome c                                  | Rabbit      | 1:5,000         | Agrisera (AS08 343A)  |
| HA (clone 3F10) | Human influenza hemagglutinin protein epitope | Rat         | 1:500           | Roche (11867423001)   |
| Nad9            | NADH-ubiquinone oxidoreductase chain 9        | Rabbit      | 1:5,000         | (12)                  |
| nMAT2           | nuclear-encoded maturase 2                    | Rabbit      | 1:200           | (10)                  |
| PetA            | Photosynthetic electron transfer A            | Rabbit      | 1:2,000         | Agrisera (AS08 306)   |
| PetB            | Photosynthetic electron transfer B            | Rabbit      | 1:5,000         | Agrisera (AS18 4169)  |
| PC              | Plastocyanin                                  | Rabbit      | 1:2,000         | Agrisera (AS06 141)   |
| Porin           | The channel - forming protein                 | Mouse       | 1:500           | (13)                  |
| PsaD            | Photosystem I subunit D                       | Rabbit      | 1:1,000         | Agrisera (AS09 461)   |
| PsbD            | Photosystem II reaction center protein D      | Rabbit      | 1:5,000         | Agrisera (AS06 146)   |
| RISP            | Rieske iron-sulfur protein                    | Rabbit      | 1:5,000         | (14)                  |
| Rpl16           | Ribosomal protein L16 (mitochondrial)         | Rabbit      | 1:1000          | Agrisera (AS15 3069)  |
| Rpl2            | Ribosomal protein L2 (chloroplastic)          | Rabbit      | 1:3,000         | Agrisera (AS15 2876)  |
| Rps1            | Ribosomal protein S1 (chloroplastic)          | Rabbit      | 1:1,000         | Agrisera (AS15 2875)  |
| Rps12           | Ribosomal protein S12 (chloroplastic)         | Rabbit      | 1:10,000        | Agrisera (AS12 2114)  |
| RPS14           | Ribosomal protein S14 (mitochondrial)         | Rabbit      | 1:1000          | Agrisera (AS16 4094 ) |
| Rps7            | Ribosomal protein S7 (chloroplastic)          | Rabbit      | 1:3000          | Agrisera (AS15 2877)  |
| Tubulin         | $\alpha$ -subunit of tubulin                  | Mouse       | 1:5,000         | Sigma (T5168 )        |
| ZM-mTERF4       | Maize mTERF protein 4                         | Rabbit      | 1:3,000         | (15)                  |

**Table S3. Accession numbers of proteins used in phylogenetic analyses.**

| Speices                     | Accession numbers | Taxon        |
|-----------------------------|-------------------|--------------|
| <i>Arabidopsis thaliana</i> | AT3G22450         | Dicotyledons |
|                             | AT5G27820         |              |
|                             | AT1G08845         |              |
|                             | AT2G43310         |              |
|                             | AT3G45020         |              |
|                             | AT1G48350         |              |
|                             | AT3G20230         |              |
|                             | AT1G14205         |              |
|                             | AT3G25520         |              |
|                             | AT5G39740         |              |
| <i>Brassica napus</i>       | CDY15088.1        | Dicotyledons |
|                             | CDY15089.1        |              |
|                             | CDY27889.1        |              |
|                             | CDY50258.1        |              |
|                             | CDY52293.1        |              |
|                             | CDY52294.1        |              |
|                             | XP013655608.1     |              |
|                             | XP013688027.1     |              |
|                             | XP013712154.1     |              |
|                             | XP013716293.1     |              |
|                             | XP013721243.1     |              |
|                             | XP013725072.1     |              |
|                             | XP013751606.2     |              |
| XP022547979.1               |                   |              |
| <i>Capsella rubella</i>     | XP006282684.1     | Dicotyledons |
|                             | XP006284123.1     |              |
|                             | XP006286599.2     |              |
|                             | XP006292041.1     |              |
|                             | XP006296106.1     |              |
|                             | XP006296719.1     |              |
|                             | XP006298484.2     |              |
|                             | XP006299139.1     |              |
|                             | XP006304252.1     |              |
|                             | XP006305667.1     |              |
|                             | XP006306511.1     |              |
| <i>Carica papaya</i>        | XP021889519.1     | Dicotyledons |
|                             | XP021890576.1     |              |
|                             | XP021893220.1     |              |
|                             | XP021896089.1     |              |
|                             | XP021900355.1     |              |
|                             | XP021907220.1     |              |



|                                |                            |                |
|--------------------------------|----------------------------|----------------|
|                                | XP021912055.1              |                |
|                                | XP021912150.1              |                |
| <i>Citrus clementina</i>       | XP006419937.1              |                |
|                                | XP006423824.1              |                |
|                                | XP006431833.1              |                |
|                                | XP006433150.1              |                |
|                                | XP006438704.1              |                |
|                                | XP006441940.1              |                |
|                                | XP006443043.2              |                |
|                                | XP024040181.1              |                |
|                                | <i>Populus trichocarpa</i> | 013G128600     |
| 014G174000                     |                            |                |
| 014G197100                     |                            |                |
| 019G099000                     |                            |                |
| XP002319579.1                  |                            |                |
| XP006376245.2                  |                            |                |
| XP006384940.2                  |                            |                |
| XP024444949.1                  |                            |                |
| XP024460627.1                  |                            |                |
| XP024461911.1                  |                            |                |
| XP024463433.1                  |                            |                |
| XP024465464.1                  |                            |                |
| <i>Theobroma cacao</i>         |                            | XP007014073.2  |
|                                | XP007016846.1              |                |
|                                | XP007030107.1              |                |
|                                | XP007033701.1              |                |
|                                | XP007033969.2              |                |
|                                | XP007045886.2              |                |
|                                | XP007046074.2              |                |
|                                | XP007049513.1              |                |
|                                | XP017976202.1              |                |
| <i>Vitis vinifera</i>          | G01038188001               |                |
|                                | XP002263231.1              |                |
|                                | XP002265052.1              |                |
|                                | XP002266607.2              |                |
|                                | XP002270819.1              |                |
|                                | XP002276553.1              |                |
|                                | XP002276584.3              |                |
|                                | XP002278526.1              |                |
|                                | XP002283176.1              |                |
| <i>Brachypodium distachyon</i> | Bradi1g13630               | Monocotyledons |
|                                | Bradi4g13640               |                |
|                                | Bradi5g09500               |                |
|                                | XP003562022.1              |                |

|                                   |                |             |
|-----------------------------------|----------------|-------------|
|                                   | XP003563357.1  |             |
|                                   | XP003566477.2  |             |
|                                   | XP003570130.1  |             |
|                                   | XP003574328.1  |             |
|                                   | XP010238469.1  |             |
|                                   | XP014757091.1  |             |
| <i>Sorghum bicolor</i>            | 001G517600     |             |
|                                   | 003G387900     |             |
|                                   | XP002446092.1  |             |
|                                   | XP002462788.1  |             |
|                                   | XP002463594.1  |             |
|                                   | XP002465793.1  |             |
|                                   | XP002467495.1  |             |
|                                   | XP021313879.1  |             |
|                                   | XP021319899.1  |             |
| <i>Oryza sativa Japonica</i>      | Os01g0896700   |             |
|                                   | Os01g0896800   |             |
|                                   | XP015610976.1  |             |
|                                   | XP015614406.1  |             |
|                                   | XP015614437.1  |             |
|                                   | XP015623581.1  |             |
|                                   | XP015625168.1  |             |
|                                   | XP015630413.1  |             |
|                                   | XP015630739.1  |             |
| <i>Zea mays</i>                   | NP001150322.1  |             |
|                                   | NP001151288.1  |             |
|                                   | NP001361504.1  |             |
|                                   | NP001361506.1  |             |
|                                   | XP008646075.1  |             |
|                                   | XP008651469.1  |             |
|                                   | XP008653044.1  |             |
|                                   | Zm00001d012161 |             |
|                                   | Zm00001d027512 |             |
|                                   | Zm00001d042525 |             |
| <i>Picea sitchensis</i>           | ABK22610.1     | Gymnosperms |
|                                   | ABK23983.1     |             |
|                                   | ABK25907.1     |             |
|                                   | ABK27001.1     |             |
|                                   | ABR17003.1     |             |
| <i>Selaginella moellendorffii</i> | XP002963369.2  | Bryophytes  |
|                                   | XP002966231.2  |             |
|                                   | XP002971921.2  |             |
|                                   | XP002974657.2  |             |
|                                   | XP002974855.2  |             |

|                                         |                |             |
|-----------------------------------------|----------------|-------------|
|                                         | XP002989809.2  |             |
|                                         | XP002993055.2  |             |
|                                         | XP024521899.1  |             |
| <i>Physcomitrella patens</i>            | PP00038G01610  |             |
|                                         | PP00097G00560  |             |
|                                         | PP00364G00030  |             |
|                                         | PP00371G00150  |             |
|                                         | XP024368324.1  |             |
|                                         | XP024369260.1  |             |
|                                         | XP024375627.1  |             |
|                                         | XP024376468.1  |             |
|                                         | XP024379707.1  |             |
|                                         | XP024388120.1  |             |
|                                         | XP024394632.1  |             |
| <i>Marchantia polymorpha</i>            | PTQ36989.1     |             |
|                                         | PTQ42040.1     |             |
| <i>Ostreococcus lucimarinus CCE9901</i> | XP001418789.1  | Chlorophyta |
| <i>Ostreococcus tauri</i>               | XP022839521.1  |             |
| <i>Chlamydomonas reinhardtii</i>        | XP001690256.1  |             |
| <i>Volvox carteri f.nagariensis</i>     | XP002948447.1  |             |
| <i>Klebsormidium nitens</i>             | GAQ88143.1     | Bacteria    |
| <i>Synechocystis sp.</i>                | AGF51023.1     |             |
| <i>Nostoc punctiforme</i>               | RCJ34281.1     |             |
| <i>Oscillatoria acuminata</i>           | WP015148985.1  |             |
| <i>Rickettsia akari</i>                 | WP012149889.1  |             |
| <i>Escherichia coli</i>                 | WP076797619.1  |             |
| <i>Drosophila melanogaster</i>          | NP_610818.1    | Animalia    |
| <i>Homo sapiens</i>                     | NP_054880.2    |             |
| <i>Mus musculus</i>                     | NP_080586.1    |             |
| <i>Heimdallarchaeota archaeon</i>       | OLS23692.1     | Archaeal    |
| <i>Odinarchaeota archaeon</i>           | OLS18045.1     |             |
| <i>Vulcanisaeta distributa</i>          | WP_013337397.1 |             |
| <i>Zestosphaera tikiterensis</i>        | PUA33404.1     |             |

**Table S4. Pigment content and chlorophyll fluorescence parameters in wild-type and *ul18-18* mutant plants.**

| Parameter                              | Col-0                  | <i>ul18-18-1</i>       | <i>ul18-18-2</i>       |
|----------------------------------------|------------------------|------------------------|------------------------|
| Water content (% fresh weight)         | 90.94 ± 0.29 <b>a</b>  | 92.52 ± 1.55 <b>a</b>  | 92.37 ± 0.37 <b>a</b>  |
| Total chlorophyll (µg/mg fresh weight) | 0.632 ± 0.081 <b>a</b> | 0.540 ± 0.077 <b>a</b> | 0.541 ± 0.096 <b>a</b> |
| Carotenoids (µg/mg fresh weight)       | 0.086 ± 0.015 <b>a</b> | 0.075 ± 0.009 <b>a</b> | 0.076 ± 0.012 <b>a</b> |
| Chlorophyll a/b                        | 2.37 ± 0.07 <b>a</b>   | 2.28 ± 0.05 <b>a</b>   | 2.248 ± 0.22 <b>a</b>  |
| Fv/Fm                                  | 0.837 ± 0.012 <b>a</b> | 0.743 ± 0.064 <b>b</b> | 0.739 ± 0.022 <b>b</b> |
| qL                                     | 0.755 ± 0.073 <b>a</b> | 0.451 ± 0.777 <b>b</b> | 0.476 ± 0.009 <b>b</b> |
| NPQ max                                | 2.127 ± 0.287 <b>a</b> | 2.622 ± 0.257 <b>b</b> | 2.589 ± 0.186 <b>b</b> |
| NPQ relax                              | 0.666 ± 0.130 <b>a</b> | 0.690 ± 0.211 <b>a</b> | 0.673 ± 0.108 <b>a</b> |

Data are presented as means ± SD (n=4). Grouping information using the Fisher Method and 95% confidence is given by bold lowercase letters.

#### SI References

1. J. M. Alonso *et al.*, Genome-wide insertional mutagenesis of *Arabidopsis thaliana*. *Science* **301**, 653 (2003).
2. T. Nakagawa *et al.*, Development of series of gateway binary vectors, pGWBs, for realizing efficient construction of fusion genes for plant transformation. *J Biosci Bioeng* **104**, 34-41 (2007).
3. M. Uyttewaal *et al.*, Characterization of *Raphanus sativus* pentatricopeptide repeat proteins encoded by the fertility restorer locus for *Ogura* cytoplasmic male sterility. *Plant cell* **20**, 3331-3345 (2008).
4. J. J. McDermott, K. P. Watkins, R. Williams-Carrier, A. Barkan, Ribonucleoprotein capture by in vivo expression of a designer pentatricopeptide repeat protein in *Arabidopsis*. *Plant Cell* **31**, 1723–1733 (2019).
5. C. Wang, F. Aubé, M. Quadrado, C. Dargel-Graffin, H. Mireau, Three new pentatricopeptide repeat proteins facilitate the splicing of mitochondrial transcripts and complex I biogenesis in *Arabidopsis*. *J Exp Bot*. **69**, 5131-5140 (2018).
6. N. Haili *et al.*, The MTL1 Pentatricopeptide Repeat Protein Is Required for Both Translation and Splicing of the Mitochondrial NADH DEHYDROGENASE SUBUNIT7 mRNA in *Arabidopsis*. *Plant Physiol.* **170**, 354-366 (2016).
7. A. F. de Longevialle *et al.*, The pentatricopeptide repeat gene OTP51 with two LAGLIDADG motifs is required for the cis-splicing of plastid *ycf3* intron 2 in *Arabidopsis thaliana*. *Plant J.* **56**, 157-168 (2008).
8. J. Van Leene *et al.*, Isolation of transcription factor complexes from *Arabidopsis* cell suspension cultures by tandem affinity purification. *Methods Mol. Biol.* **754**, 195-218 (2011).
9. A. R. Wellburn, The spectral determination of chlorophylls a and b, as well as total carotenoids, using various solvents with spectrophotometers of different resolution. *J. Plant Physiol.* **144**, 307-313 (1994).

10. I. Keren *et al.*, AtnMat2, a nuclear-encoded maturase required for splicing of group-II introns in Arabidopsis mitochondria. *RNA* **15**, 2299-2311 (2009).
11. S. Sunderhaus *et al.*, Carbonic anhydrase subunits form a matrix-exposed domain attached to the membrane arm of mitochondrial complex I in plants. *J. Biol. Chem.* **281**, 6482-6488 (2006).
12. L. LAMATTINA, D. GONZALEZ, J. GUALBERTO, J. M. GRIENENBERGER, Higher plant mitochondria encode an homologue of the nuclear - encoded 30 - kDa subunit of bovine mitochondrial complex I. *FEBS J.* **217**, 831-838 (1993).
13. N. L. Taylor *et al.*, Environmental stresses inhibit and stimulate different protein import pathways in plant mitochondria. *FEBS Lett.* **547**, 125-130 (2003).
14. C. Carrie *et al.*, Conserved and novel functions for Arabidopsis thaliana MIA40 in assembly of proteins in mitochondria and peroxisomes. *J. Biol. Chem.* **285**, 36138-36148 (2010).
15. K. Hammani, A. Barkan, An mTERF domain protein functions in group II intron splicing in maize chloroplasts. *Nucleic Acids Res.* **42**, 5033-5042 (2014).
